# Supplementary material for: Enhanced photocatalytic activity of mesoporous TiO2aggregates by embedding carbon nanotubes as electron-transfer channel
Source: Royal Society of Chemistry journal article supplement (doi:10.1039/c0cp01139h), 2010-12-21
Supplement: c0cp01139h.pdf [file c0cp01139h.pdf]

## Electronic supplementary information (ESI)

### Enhanced photocatalytic activity of mesoporous TiO<sub>2</sub> aggregates by embedded carbon nanotubes as electron-transfer channel

Jiaguo Yu,<sup>\*</sup> Tingting Ma, Shengwei Liu

*State Key Laboratory of Advanced Technology for Material Synthesis and processing,  
Wuhan University of Technology, Luoshi Road 122#, Wuhan 430070, P. R. China.*

*E-mail: [jiaguoyu@yahoo.com](mailto:jiaguoyu@yahoo.com)*

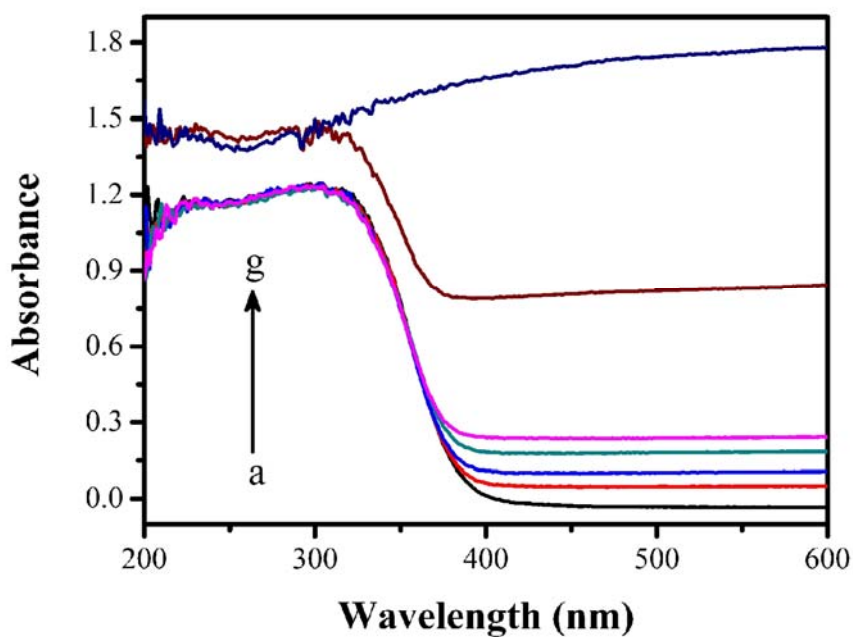

**Figure S1.** UV-vis diffuse reflection spectra of MWCNTs/TiO<sub>2</sub> nanocomposite samples with loading 0 (a), 0.05 (b), 0.1 (c), 0.25 (d), 0.5 (e) and 10 wt.% (f) MWCNTs by hydrothermal process and pure MWCNTs (g).
